# Supplementary material for: The dynamic strategy shifting task: Optimisation of an operant task for assessing cognitive flexibility in rats
Source: PubMed Central journal article supplement (PMC11240049; doi:10.3389/fpsyt.2024.1303728), 2024-06-28

# 2023 Dynamic Strategy Shifting Task —TEST PROTOCOL

## Main protocol (S.S.2)

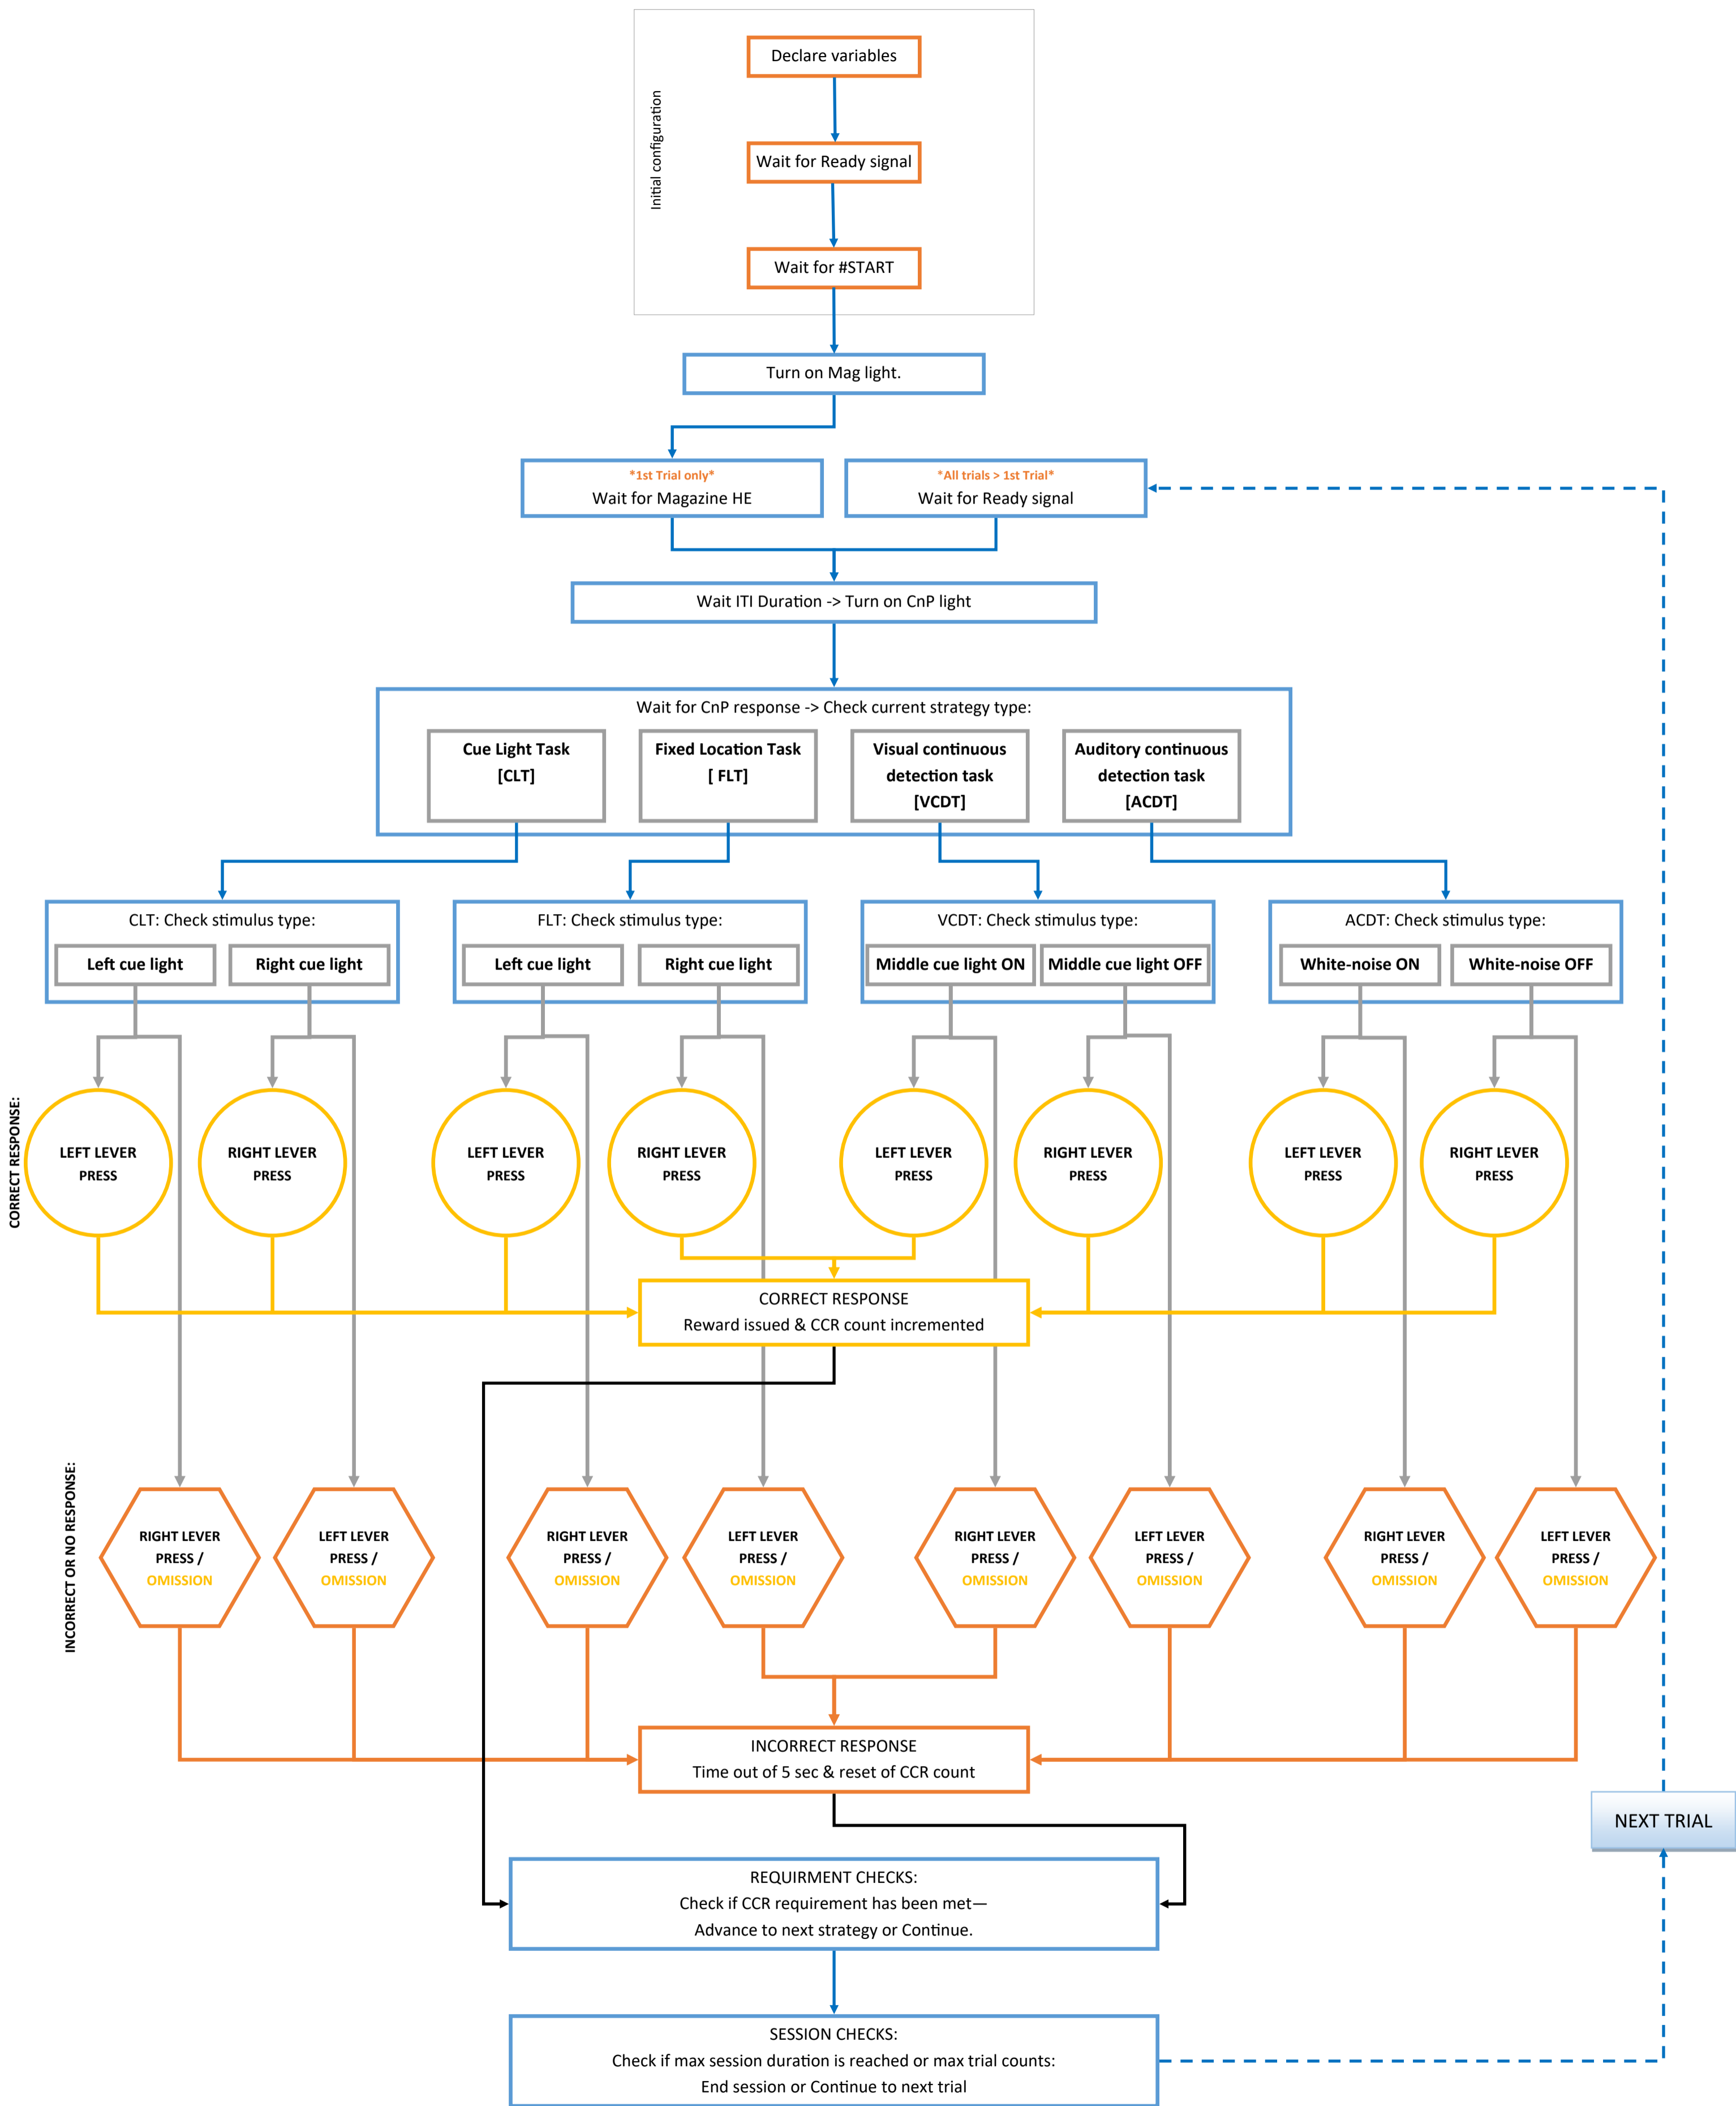

Supplement: Image_1.pdf [file Image_1.pdf]
